# Supplementary material for: Ultrafast light field tomography for snapshot transient and non-line-of-sight imaging
Source: PubMed Central journal article supplement (PMC8041853; doi:10.1038/s41467-021-22461-0), 2021-04-12
Supplement: 41467_2021_22461_MOESM3_ESM.pdf [file 41467_2021_22461_MOESM3_ESM.pdf]

## **Description of Additional Supplementary Files**

File name: Supplementary Movie 1

Description: 3D imaging of a picosecond laser pulse propagation inside a fiber.

File name: Supplementary Movie 2

Description: Deep adjoint neural network for mitigating the limited view problem.

File name: Supplementary Movie 3

Description: Animated 3D visualization of Letters V and I.

File name: Supplementary Movie 4

Description: Video rate NLOS imaging at 30 Hz.
